# Supplementary material for: Droplet evaporation characteristics on transparent heaters with different wettabilities
Source: Royal Society of Chemistry journal article supplement (doi:10.1039/c7ra08888d), 2017-01-01
Supplement: c7ra08888d1.pdf [file c7ra08888d1.pdf]

## Electronic Supplementary Information

### **Droplet evaporation characteristics on transparent heaters with different wettabilities**

Suhan Lee,<sup>a</sup> Dong-Ik Kim,<sup>b</sup> Young-You Kim,<sup>c</sup> Sung-Eun Park,<sup>d</sup> Gyuseok Choi,<sup>d</sup>

Yoonkap Kim<sup>\*d</sup> and Han-Jung Kim<sup>\*b</sup>

<sup>a</sup> *Convergence Medical Devices Research Center, Gumi Electronics & Information Technology Research Institute (GERI), Gumi 39253, South Korea*

<sup>b</sup> *Center for Integrated Smart Sensors (CISS), Korea Advanced Institute of Science and Technology (KAIST), Daejeon 34141, South Korea*

<sup>c</sup> *Department of Physics, Kongju National University, Gongju 32588, South Korea*

<sup>d</sup> *Convergence Materials & Parts Technology Research Center, Gumi Electronics & Information Technology Research Institute (GERI), Gumi 39171, South Korea*

Suhan Lee and Dong-Ik Kim contributed equally to this work.

\*Corresponding authors.

E-mail address: [hjkim0321@kaist.ac.kr](mailto:hjkim0321@kaist.ac.kr) (**Dr. H.-J. Kim**); [yunkap@geri.re.kr](mailto:yunkap@geri.re.kr) (Dr. Y. Kim)

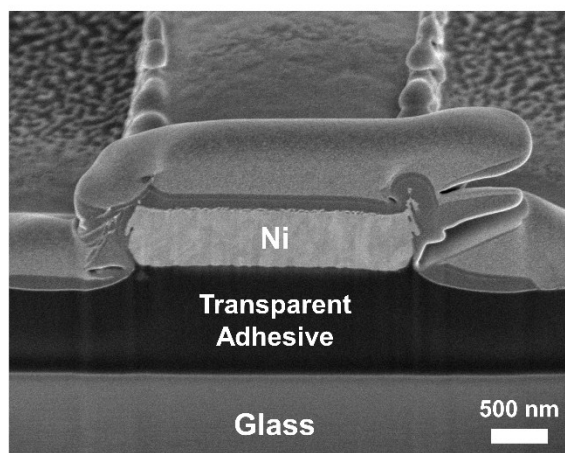

Fig. S1. Cross-sectional FE-SEM image of the Ni mesh structure on glass.

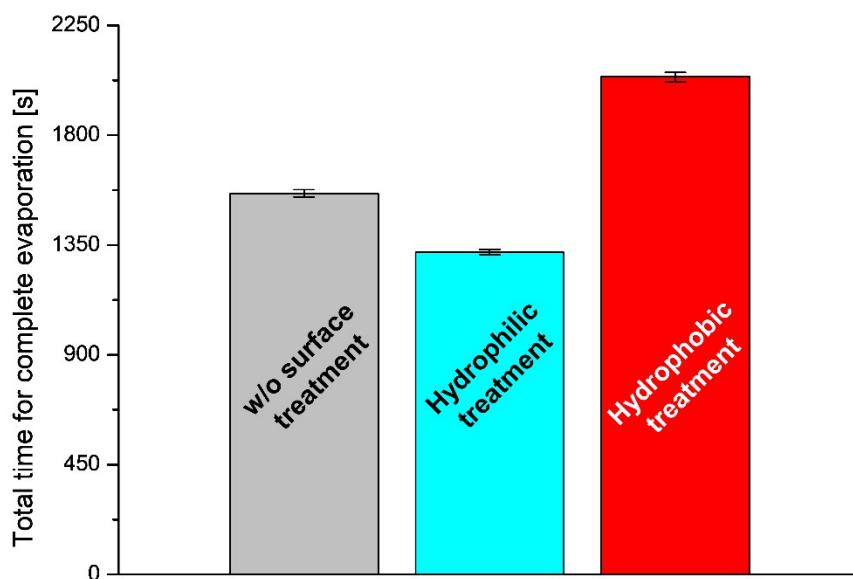

Fig. S2. Complete evaporation times of water droplets on the surfaces of Ni mesh-based transparent heaters with different wetting properties at room temperature.

with hydrophilic surface, at 30 °C

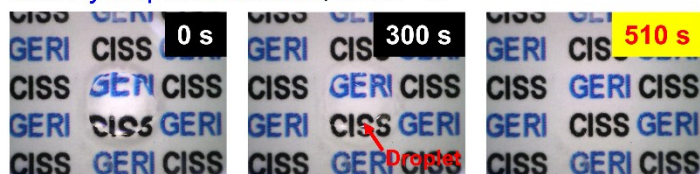

w/o surface treatment, at 30 °C

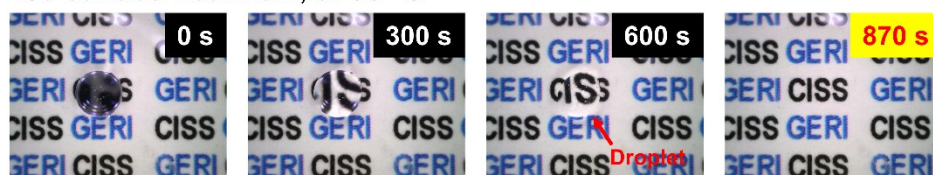

with hydrophobic surface, at 30 °C

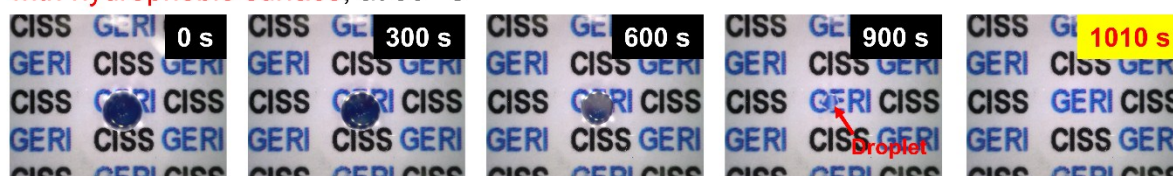

Fig. S3. Evaporation process of water droplets on the surfaces of the Ni mesh-based transparent heaters with different wetting properties at 30 °C.

with hydrophilic surface, at 45 °C

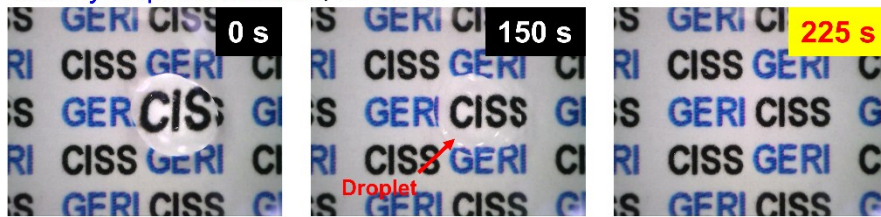

w/o surface treatment, at 45 °C

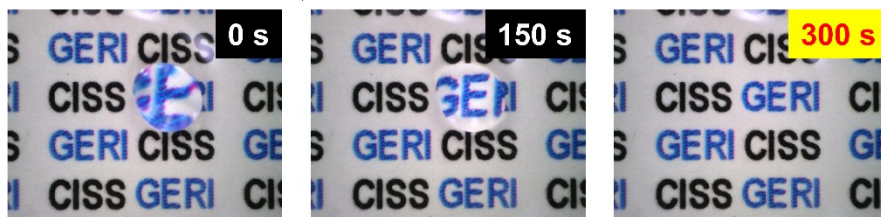

with hydrophobic surface, at 45 °C

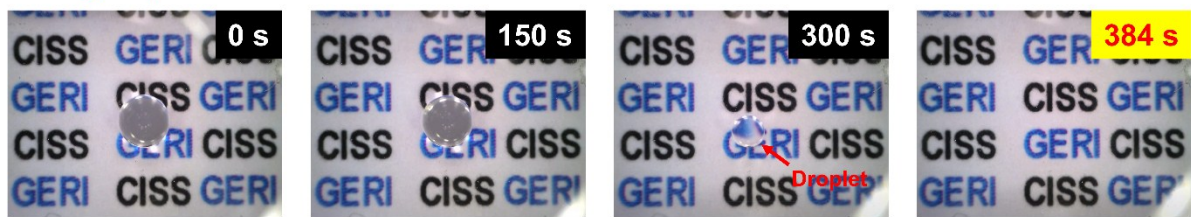

Fig. S4 Evaporation process of water droplets on the surfaces of the Ni mesh-based transparent heaters with different wetting properties at 45 °C.

with hydrophilic surface, at 65 °C

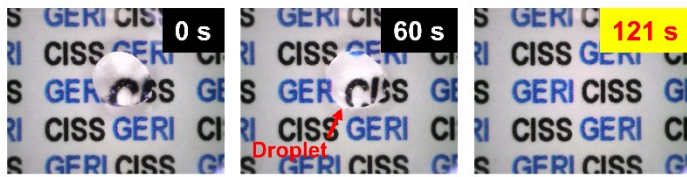

w/o surface treatment, at 65 °C

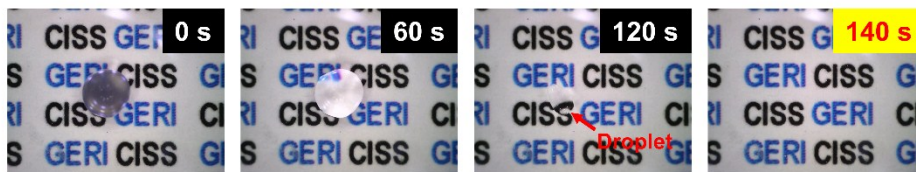

with hydrophobic surface, at 65 °C

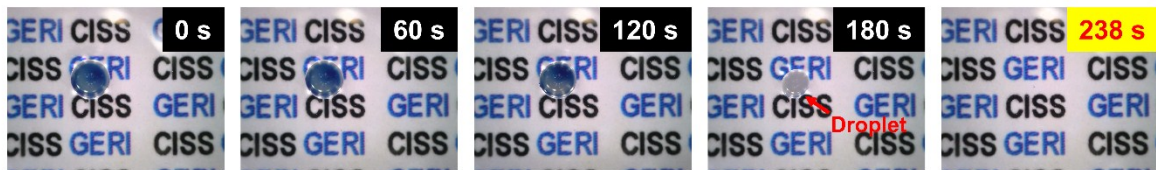

Fig. S5 Evaporation process of water droplets on the surfaces of the Ni mesh-based transparent heaters with different wetting properties at 65 °C.

with hydrophilic surface, at 95 °C

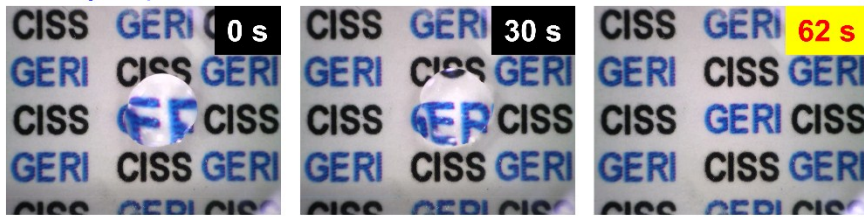

w/o surface treatment, at 95 °C

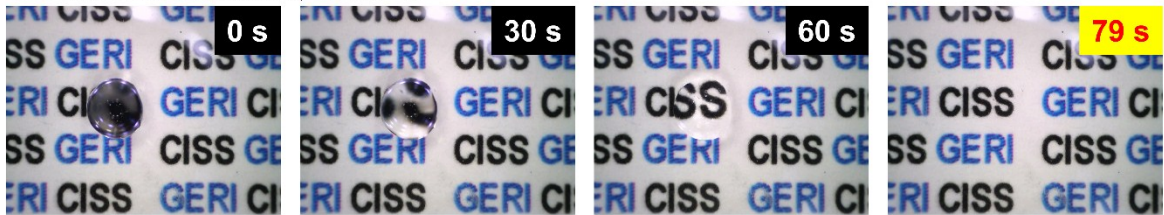

with hydrophobic surface, at 95 °C

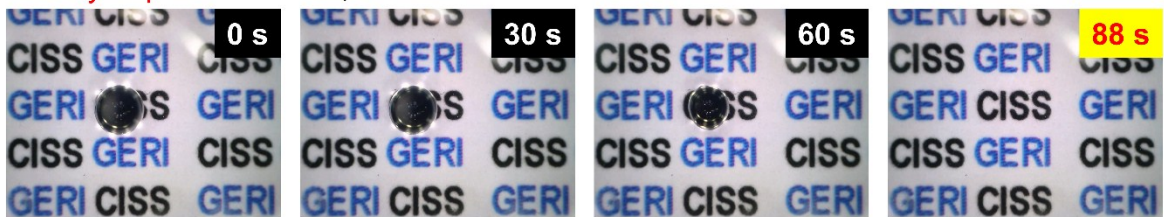

Fig. S6 Evaporation process of water droplets on the surfaces of the Ni mesh-based transparent heaters with different wetting properties at 95 °C.

Table S1. Total times for the complete water droplet evaporation on Si substrates with different wetting properties and heating temperatures.

| Temperature      | w/o surface treatment (CA < 10°) | Hydrophilic treatment (CA = 76°) | Hydrophobic treatment (CA = 107°) |
|------------------|----------------------------------|----------------------------------|-----------------------------------|
| Room Temperature | 1,487 s                          | 1,267 s                          | 1,947 s                           |
| 45 °C            | 286 s                            | 223 s                            | 368 s                             |
| 80 °C            | 110 s                            | 91 s                             | 163 s                             |
